# Supplementary material for: Mediterranean Native Leguminous Plants: A Reservoir of Endophytic Bacteria with Potential to Enhance Chickpea Growth under Stress Conditions
Source: MDPI journal article supplement (doi:10.3390/microorganisms7100392), 2019-09-25
Supplement: s1 [file s1]

**Table S1.** Results obtained for cellulase activity, IAA synthesis, siderophore production, phosphate solubilization and antifungal activity.; Cellulase activity classes: 0 - no activity; 1 - ( $> 0$  and  $\leq 0.5$  cm ); 2 - ( $> 0.5$  and  $\leq 1$  cm) and 3 - ( $> 1$  cm); n.d. - not determined. Accession number for partial 16S rRNA gene sequence.

| Origin         | Legume species                  | Isolate | IAA production<br>[ $\mu\text{g/ml}$ ] | Cellulase activity<br>class | ACC deaminase<br>[ $\mu\text{mol } \alpha\text{-ketobutyrate/mg protein/h}$ ] | Antifungal activity | Siderophores production<br>index | Phosphate solubilization<br>index | Accession number |
|----------------|---------------------------------|---------|----------------------------------------|-----------------------------|-------------------------------------------------------------------------------|---------------------|----------------------------------|-----------------------------------|------------------|
| Alcácer do Sal | <i>Lupinus angustifolius</i> L. | Q1      | 0                                      | 2                           | 8,75                                                                          | yes                 | 2,681                            | 1,222                             | MK007434         |
|                |                                 | Q2      | 0                                      | 1                           | 2,50                                                                          | yes                 | 3,000                            | 1                                 | MK007435         |
|                |                                 | Q3      | 0                                      | 0                           | 0                                                                             | -                   | 1                                | 1                                 | MK007436         |
|                |                                 | Q4      | 1,4                                    | n.d.                        | 0                                                                             | -                   | 1                                | 1                                 | MK007437         |
|                |                                 | Q5      | 1,1                                    | 0                           | 0                                                                             | yes                 | 1                                | 1                                 | MK007438         |
|                |                                 | Q6      | 41,6                                   | 2                           | 0                                                                             | yes                 | 1                                | 1,238                             | MK007439         |
|                | <i>Lupinus luteus</i> L.        | O1      | 4,4                                    | 0                           | 0                                                                             | -                   | 1                                | 1                                 | MK007424         |
|                |                                 | O2      | 0,5                                    | 1                           | 0                                                                             | -                   | 1                                | 2,111                             | MK007425         |
|                |                                 | O3      | 3                                      | 1                           | 0                                                                             | -                   | 1                                | 1                                 | MK007426         |
|                |                                 | O4      | 0                                      | 1                           | 0                                                                             | -                   | 1                                | 1,867                             | MK007427         |
|                | <i>Medicago polymorpha</i> L.   | R1      | 22,7                                   | n.d.                        | 2,58                                                                          | -                   | 3,625                            | 1                                 | MK007440         |
|                |                                 | R2      | 0                                      | 1                           | 0                                                                             | -                   | 1,287                            | 1                                 | MK007441         |
|                |                                 | R3      | 0                                      | 2                           | 0                                                                             | yes                 | 1                                | 1                                 | MK007442         |
|                |                                 | R4      | 5,3                                    | 0                           | 0                                                                             | -                   | 1                                | 1                                 | MK007443         |
|                |                                 | R5      | 0                                      | 1                           | 0                                                                             | -                   | 1,203                            | 1,300                             | MK007444         |
|                |                                 | R6      | 0                                      | 2                           | 0                                                                             | -                   | 1                                | 1                                 | MK007445         |
|                |                                 | R7      | 0                                      | 1                           | 0                                                                             | -                   | 1,258                            | 1,400                             | MK007446         |
|                |                                 | R8      | 0                                      | 0                           | 0                                                                             | yes                 | 1                                | 1                                 | MK007447         |
|                |                                 | T1      | 0,2                                    | 0                           | 0                                                                             | -                   | 1                                | 1                                 | MK007456         |

|                                    |            |      |      |      |     |       |       |          |
|------------------------------------|------------|------|------|------|-----|-------|-------|----------|
|                                    | <b>T10</b> | 0    | 0    | 0    | -   | 1     | 1     | MK007465 |
|                                    | <b>T11</b> | 0    | 0    | 2,07 | -   | 1     | 1,292 | MK007466 |
|                                    | <b>T12</b> | 0    | 0    | 0    | -   | 1     | 1     | MK007467 |
|                                    | <b>T13</b> | 1,5  | 0    | 0    | -   | 1     | 1     | MK007468 |
|                                    | <b>T14</b> | 0,7  | n.d. | 0    | -   | 1     | 1     | MK007469 |
|                                    | <b>T2</b>  | 0    | 0    | 0    | -   | 1,285 | 1,333 | MK007457 |
|                                    | <b>T3</b>  | 1,4  | 2    | 0    | -   | 1,239 | 1,206 | MK007458 |
|                                    | <b>T4</b>  | 0    | 0    | 0    | -   | 1     | 1     | MK007459 |
|                                    | <b>T5</b>  | 54   | 0    | 0    | yes | 1     | 1,587 | MK007460 |
|                                    | <b>T6</b>  | 0    | 1    | 0    | -   | 1,267 | 1,237 | MK007461 |
|                                    | <b>T7</b>  | 0,2  | 1    | 0    | -   | 1     | 1,237 | MK007462 |
|                                    | <b>T8</b>  | 0    | 0    | 0    | -   | 1     | 1     | MK007463 |
|                                    | <b>T9</b>  | 1,8  | 1    | 0    | -   | 1     | 1     | MK007464 |
| <i>Ornithopus compressus</i><br>L. | <b>N1</b>  | 0,1  | 0    | 0    | -   | 1     | 1     | MK007422 |
|                                    | <b>N2</b>  | 0    | 0    | 0    | -   | 1     | 1     | MK007423 |
| <i>Ornithopus sativus</i><br>Brot. | <b>P1</b>  | 22   | n.d. | 0    | -   | 4,037 | 1     | MK007428 |
|                                    | <b>P2</b>  | 0    | 1    | 0    | -   | 1     | 1,550 | MK007429 |
|                                    | <b>P3</b>  | 0    | 1    | 0    | -   | 1,276 | 1     | MK007430 |
|                                    | <b>P4</b>  | 0    | 3    | 0    | -   | 1     | 1     | MK007431 |
|                                    | <b>P5</b>  | 5,1  | 0    | 0    | -   | 1     | 1     | MK007432 |
|                                    | <b>P6</b>  | n.d. | n.d. | 0    | -   | n.d.  | n.d.  | MK007433 |
| <i>Vicia sativa</i> L.             | <b>S1</b>  | 0    | 1    | 0    | -   | 1     | 1     | MK007448 |
|                                    | <b>S2</b>  | 0    | 0    | 0    | -   | 2,540 | 1     | MK007449 |
|                                    | <b>S3</b>  | 0    | 1    | 0    | -   | 1     | 1     | MK007450 |
|                                    | <b>S4</b>  | 0,4  | 0    | 0    | -   | 1,829 | 1     | MK007451 |
|                                    | <b>S5</b>  | 2,3  | 0    | 0    | -   | 1     | 1,322 | MK007452 |
|                                    | <b>S6</b>  | 0,8  | n.d. | 0    | -   | 1     | 1     | MK007453 |

|                  |                                 |           |      |      |      |     |       |       |          |
|------------------|---------------------------------|-----------|------|------|------|-----|-------|-------|----------|
|                  |                                 | <b>S7</b> | 0    | 0    | 0    | -   | 1     | 1,400 | MK007454 |
|                  |                                 | <b>S8</b> | 0    | 0    | 0    | -   | 2,167 | 1     | MK007455 |
| Herdade da Mitra | <i>Lupinus luteus</i> L.        | <b>B1</b> | 0    | 2    | 0    | -   | 1     | 1     | MK007352 |
|                  |                                 | <b>B2</b> | 0    | 3    | 0    | -   | 1     | 1     | MK007353 |
|                  |                                 | <b>B3</b> | 59,1 | 0    | 0    | -   | 1     | 2,167 | MK007354 |
|                  | <i>Medicago polymorpha</i> L.   | <b>G1</b> | 7,2  | 0    | 0    | yes | 1     | 1     | MK007379 |
|                  |                                 | <b>G2</b> | 11,7 | 3    | 0    | yes | 4,506 | 1     | MK007380 |
|                  |                                 | <b>G4</b> | 7,5  | 3    | 0    | -   | 1     | 1     | MK007381 |
|                  |                                 | <b>G5</b> | 8,1  | 0    | 0    | -   | 1     | 1,583 | MK007382 |
|                  |                                 | <b>G6</b> | 3,4  | 0    | 0    | -   | 1     | 1     | MK007383 |
|                  |                                 | <b>J1</b> | n.d. | n.d. | 0    | -   | 1,333 | 1     | MK007391 |
|                  |                                 | <b>J2</b> | 11,2 | 3    | 0    | -   | 1     | 1     | MK007392 |
|                  |                                 | <b>J3</b> | 1,8  | 1    | 0    | -   | 1     | 1     | MK007393 |
|                  |                                 | <b>J4</b> | 2,5  | 2    | 0    | -   | 1     | 1,917 | MK007394 |
|                  |                                 | <b>J5</b> | 1,8  | 0    | 0    | -   | 1     | 1,250 | MK007395 |
|                  |                                 | <b>J6</b> | 97,1 | 2    | 0    | -   | 1     | 1     | MK007396 |
|                  |                                 | <b>J7</b> | 1,7  | 1    | 0    | -   | 1     | 1,667 | MK007397 |
|                  |                                 | <b>J8</b> | 2,3  | 2    | 0    | -   | 1     | 1     | MK007398 |
|                  |                                 | <b>J9</b> | 0,8  | 2    | 0    | -   | 1     | 1     | MK007399 |
|                  | <i>Ornithopus compressus</i> L. | <b>C1</b> | 12,3 | 0    | 0    | -   | 1     | 1     | MK007355 |
|                  |                                 | <b>C2</b> | 6,2  | 0    | 0    | -   | 1     | 1     | MK007356 |
|                  |                                 | <b>C3</b> | 0    | 3    | 0    | -   | 1     | 1     | MK007357 |
|                  |                                 | <b>C4</b> | 0    | 0    | 0    | -   | 1     | 2,000 | MK007358 |
|                  |                                 | <b>C5</b> | 0    | 0    | 0    | -   | 1,159 | 1,917 | MK007359 |
|                  |                                 | <b>E1</b> | 0    | 1    | 0,70 | -   | 1     | 1,667 | MK007364 |
|                  |                                 | <b>E2</b> | 0,1  | 0    | 0    | -   | 1     | 1     | MK007365 |
|                  |                                 | <b>E3</b> | 48,0 | 1    | 0    | yes | 1     | 1,889 | MK007366 |
|                  |                                 | <b>E4</b> | 0    | 1    | 0    | -   | 1,277 | 1     | MK007367 |

|                                             |            |      |      |      |     |       |       |          |
|---------------------------------------------|------------|------|------|------|-----|-------|-------|----------|
|                                             | <b>E5</b>  | 67,3 | 0    | 0    | -   | 1     | 1     | MK007368 |
|                                             | <b>E6</b>  | 0    | 2    | 0    | -   | 1,108 | 1     | MK007369 |
|                                             | <b>E6b</b> | 10,7 | 0    | 0    | -   | 1     | 1     | MK007370 |
|                                             | <b>E7</b>  | 0    | 0    | 0    | yes | 1,450 | 1     | MK007371 |
|                                             | <b>E8</b>  | 0,5  | 0    | 0    | -   | 1     | 1     | MK007372 |
|                                             | <b>E9</b>  | 0    | n.d. | 0    | -   | 2,079 | 1     | MK007373 |
|                                             | <b>L1</b>  | 55,3 | 0    | 0    | -   | 1     | 1     | MK007403 |
|                                             | <b>L10</b> | 0    | 3    | 0    | -   | 1,203 | 1     | MK007410 |
|                                             | <b>L11</b> | 0,3  | 0    | 0    | -   | 1,075 | 1     | MK007411 |
|                                             | <b>L12</b> | 14,9 | 1    | 0    | -   | 1     | 1     | MK007412 |
|                                             | <b>L13</b> | 0    | 0    | 0    | yes | 2,232 | 1     | MK007413 |
|                                             | <b>L3</b>  | 0,3  | 0    | 0    | -   | 1     | 1     | MK007404 |
|                                             | <b>L4</b>  | 0    | 1    | 0    | -   | 1,443 | 1     | MK007405 |
|                                             | <b>L5</b>  | 59,0 | 0    | 0    | yes | 1,305 | 1     | MK007406 |
|                                             | <b>L7</b>  | 0    | 2    | 0    | -   | 1,344 | 1,917 | MK007407 |
|                                             | <b>L8</b>  | 0    | 3    | 0    | -   | 1     | 1     | MK007408 |
|                                             | <b>L9</b>  | 0    | 2    | 0    | -   | 1,421 | 1     | MK007409 |
| <i>Ornithopus pinnatus</i><br>(Mill.) Druce | <b>K1</b>  | 0,7  | 1    | 0    | -   | 1,401 | 1     | MK007400 |
|                                             | <b>K2</b>  | 36,3 | 0    | 0    | -   | 1     | 1     | MK007401 |
|                                             | <b>K3</b>  | 47   | 0    | 0    | -   | 1     | 1     | MK007402 |
| <i>Scorpiurus muricatus</i> L.              | <b>D1</b>  | 0    | 0    | 0    | -   | 1     | 1     | MK007360 |
|                                             | <b>D2</b>  | 0    | 0    | 0    | -   | 1     | 1     | MK007361 |
|                                             | <b>D3</b>  | 27,5 | 0    | 0    | -   | 1     | 1     | MK007362 |
|                                             | <b>D4</b>  | 0    | 1    | 2,01 | -   | 2,778 | 1     | MK007363 |
| <i>Scorpiurus sulcatus</i> L.               | <b>H1</b>  | 14,7 | 0    | 0    | -   | 1,917 | 1     | MK007384 |
|                                             | <b>H2</b>  | 0,6  | 0    | 0    | -   | 2,833 | 1     | MK007385 |
|                                             | <b>H3</b>  | 0,8  | 1    | 0    | -   | 1,944 | 1     | MK007386 |
|                                             | <b>H4</b>  | 8,7  | 0    | 0    | -   | 1     | 1     | MK007387 |

|                                  |           |      |   |      |   |       |       |          |
|----------------------------------|-----------|------|---|------|---|-------|-------|----------|
|                                  | <b>H5</b> | 0    | 0 | 0    | - | 1     | 1     | MK007388 |
| <i>Trifolium</i> sp.             | <b>A1</b> | 9,3  | 2 | 0    | - | 1     | 1     | MK007348 |
|                                  | <b>A2</b> | 0    | 0 | 1,23 | - | 1,341 | 1     | MK007349 |
|                                  | <b>A3</b> | 36,7 | 0 | 0    | - | 1,247 | 1     | MK007350 |
|                                  | <b>A4</b> | 0    | 0 | 0    | - | 1     | 1     | MK007351 |
| <i>Trifolium subterraneum</i> L. | <b>F1</b> | 0    | 0 | 0    | - | 1,750 | 1     | MK007374 |
|                                  | <b>F2</b> | 1    | 0 | 0    | - | 1     | 1     | MK007375 |
|                                  | <b>F3</b> | 0,7  | 0 | 0    | - | 1     | 1     | MK007376 |
|                                  | <b>F4</b> | 0    | 0 | 0    | - | 1,268 | 1,417 | MK007377 |
|                                  | <b>F5</b> | 8,4  | 3 | 0    | - | 1     | 1     | MK007378 |
| <i>Trifolium tomentosum</i> L.   | <b>I1</b> | 37,4 | 2 | 0    | - | 1     | 1     | MK007389 |
|                                  | <b>I2</b> | 0    | 1 | 0    | - | 1,500 | 1     | MK007390 |
| <i>Vicia sativa</i> L.           | <b>M1</b> | 4,4  | 2 | 0    | - | 1     | 1     | MK007414 |
|                                  | <b>M2</b> | 0,2  | 0 | 0    | - | 1     | 1     | MK007415 |
|                                  | <b>M3</b> | 14,7 | 0 | 0    | - | 1,132 | 2,333 | MK007416 |
|                                  | <b>M4</b> | 4,1  | 3 | 0    | - | 1     | 1     | MK007417 |
|                                  | <b>M5</b> | 0    | 3 | 0    | - | 1     | 1     | MK007418 |
|                                  | <b>M6</b> | 0    | 0 | 0    | - | 1     | 1     | MK007419 |
|                                  | <b>M7</b> | 4,1  | 0 | 0    | - | 1     | 1     | MK007420 |
|                                  | <b>M8</b> | n.d. | 0 | 1,22 | - | 1     | 1     | MK007421 |
